# Supplementary material for: Web-Based Interventions Supporting Adolescents and Young People With Depressive Symptoms: Systematic Review and Meta-Analysis
Source: PubMed Central journal article supplement (PMC5741826; doi:10.2196/mhealth.8624), 2017-12-08
Supplement: mhealth_v5i12e180_app2.pdf [file mhealth_v5i12e180_app2.pdf]

**Table 3. Characteristics of the studies included in the narrative review rivissa tyhja vali = molemmin puolin**

| <b>Author<br/>Year</b>                                                           | <b>Country</b> | <b>Purpose</b>                                                                                                                                                                           | <b>Setting</b>                                                               | <b>Target group<br/>Age<br/>A number of<br/>randomized (N)</b> | <b>Allocation to study groups (n)</b>                                                                                                                                                          | <b>Follow-up (n)<br/>Attrition %</b> |
|----------------------------------------------------------------------------------|----------------|------------------------------------------------------------------------------------------------------------------------------------------------------------------------------------------|------------------------------------------------------------------------------|----------------------------------------------------------------|------------------------------------------------------------------------------------------------------------------------------------------------------------------------------------------------|--------------------------------------|
| <b>Burckhardt et al. 2015<sup>30</sup></b>                                       | Australia      | To examine the feasibility of an online school-based positive psychology program                                                                                                         | High schools                                                                 | High-school students, 12–15 years<br>N=572                     | 1) Bite Back (n=313)<br>2) Control group (n=259)                                                                                                                                               | 187<br>67%                           |
| <b># Calear et al. 2016<sup>45</sup></b>                                         | Australia      | To test the effectiveness of an online self-directed anxiety prevention program, and to compare two methods of implementing an anxiety program                                           | Schools                                                                      | 30 Schools, Students<br>12–18 years<br>N=1,767                 | 1) eGAD school (n=427)<br>2) eGAD health service (n = 562)<br>3) wait-list control (n = 778)                                                                                                   | 687<br>61%                           |
| <b># *Calear et al. 2009<sup>46</sup><br/># *Calear et al. 2013<sup>47</sup></b> | Australia      | To investigate the effectiveness of an online program in preventing and reducing the symptoms of anxiety and depression and adherence to an internet-based depression prevention program | Schools                                                                      | 32 schools, students<br>12–17 years<br>N=1,477                 | 1) MoodGYM (n = 563)<br>2) Wait-list (n = 914)                                                                                                                                                 | 1,194<br>19%                         |
| <b># Costin et al. 2009<sup>48</sup></b>                                         | Australia      | To evaluate a brief depression information intervention employing health e-cards                                                                                                         | Community                                                                    | Young people<br>19–24 years<br>N=348                           | 1) e-health card and depression information, basic (n = 114)<br>2) e-health card and depression information, enhanced (n = 117)<br>3) e-health card with health information, control (n = 117) | 298<br>14%                           |
| <b>Geisner et al. 2015<sup>31</sup></b>                                          | USA            | To examine the efficacy of web-based personalized feedback on reducing depressed mood and alcohol use                                                                                    | A public university                                                          | Students<br>18–24 years<br>N = 331                             | 1) Alcohol only (n = 84)<br>2) Depressed mood only (n = 84)<br>3) Integrated (n = 78)<br>4) Referral only (n = 85)                                                                             | 311<br>(8%)                          |
| <b># Hoek et al. 2012<sup>49</sup></b>                                           | Netherlands    | To evaluate the effects of preventive internet-based self-help problem-solving therapy                                                                                                   | Variety of settings (via schools, parents' mental health services, internet) | Adolescents<br>12–21 years<br>N=45                             | 1) Internet-based guided self-help intervention (n = 22)<br>2) A wait list (n = 23)                                                                                                            | 27<br>40%                            |
| <b># Ip et al. 2016<sup>50</sup></b>                                             | China          | To evaluate the effectiveness of Grasp the Opportunity in reducing depressive symptoms                                                                                                   | Secondary schools                                                            | Adolescents<br>13–17 years<br>N=257                            | 1) Grasp the Opportunity (n = 130)<br>2) attention control (n = 127)                                                                                                                           | 250<br>3%                            |

|                                                |             |                                                                                                                                     |                                                                   |                                                                    |                                                                                                                                                                          |            |
|------------------------------------------------|-------------|-------------------------------------------------------------------------------------------------------------------------------------|-------------------------------------------------------------------|--------------------------------------------------------------------|--------------------------------------------------------------------------------------------------------------------------------------------------------------------------|------------|
| <b># Kramer et al. 2014</b> <sup>51</sup>      | Netherlands | To evaluate the effectiveness of an individual chat treatment                                                                       | Community (via articles, newspapers, banners, websites, Facebook) | Young people<br>12–22 years<br>N=263                               | 1) PratenOnline (n = 131)<br>2) A wait list (n = 132)                                                                                                                    | 136<br>48% |
| <b># Levin et al. 2014</b> <sup>52</sup>       | USA         | To examine the feasibility of a prototype web-based acceptance and commitment therapy program for preventing mental health problems | Colleges                                                          | Undergraduate first-year college students<br>18–20 years<br>N=76   | 1) ACT (n = 37)<br>2) A wait list (n = 39)                                                                                                                               | 73<br>4%   |
| <b># Lillevoll et al. 2014</b> <sup>53</sup>   | Norway      | To evaluate the feasibility and efficacy of disseminating a self-directed internet-based mental health intervention                 | Senior high schools                                               | Students<br>15–20 years<br>N=707                                   | 1) MoodGYM without reminders (n = 176)<br>2) MoodGYM with standard reminders (n = 176)<br>3) MoodGYM with tailored reminders (n = 175)<br>4) Control condition (n = 180) | 503<br>29% |
| <b>Manicavasagar et al. 2014</b> <sup>33</sup> | Australia   | To explore the feasibility of the online delivery of a youth positive psychology program                                            | Schools and youth organizations                                   | Adolescents<br>12–18 years<br>N=235                                | 1) Bite Back (n = 120)<br>2) Control websites (n = 115)                                                                                                                  | 167<br>29% |
| <b># Merry et al. 2012</b> <sup>54</sup>       | New Zealand | To evaluate whether the computerized CBT intervention reduces depressive symptoms as much or more than treatment as usual           | Primary healthcare                                                | Adolescents<br>12–19 years<br>N=187                                | 1) SPARX (n = 94)<br>2) Control group (n = 93)                                                                                                                           | 168<br>10% |
| <b># Poppelaars et al. 2016</b> <sup>55</sup>  | Netherlands | To test the effectiveness of OVK and SPARX separately, as well as in combination                                                    | Secondary education                                               | Girls<br>11–16 years<br>N=208                                      | 1) OVK only (n = 50)<br>2) SPARX (n = 51)<br>3) OVK and SPARX combined (n = 56)<br>4) Monitoring control condition (n = 51)                                              | 159<br>24% |
| <b># Reid et al. 2011</b> <sup>56</sup>        | Australia   | To examine the mental health benefits of the mobile type program                                                                    | Primary care                                                      | Patients in general practices<br>12–24 years old<br>N=118          | 1) The mobile type monitoring intervention (n = 69)<br>2) The comparison program group (n = 49)                                                                          | 86<br>27%  |
| <b># Rickhi et al. 2015</b> <sup>57</sup>      | Canada      | To evaluate the effectiveness of an online spirituality informed e-mental health intervention on depression severity                | Community                                                         | Adolescents<br>13–18 years;<br>Young adults<br>19–24 years<br>N=63 | 1) Study arm<br>a. Younger (n = 18)<br>b. Older (n = 16)<br>2) Wait list<br>a. Younger (n = 13)<br>b. Older (n = 16)                                                     | 59<br>6%   |
| <b># Sethi et al.</b>                          | Australia   | To assess the efficacy of online                                                                                                    | University, the                                                   | Students                                                           | 1) MoodGYM (n = 9)                                                                                                                                                       | 38         |

|                                                                                                                                                                                                                                             |                |                                                                                                                                       |                                                |                                                |                                                                                                                          |           |
|---------------------------------------------------------------------------------------------------------------------------------------------------------------------------------------------------------------------------------------------|----------------|---------------------------------------------------------------------------------------------------------------------------------------|------------------------------------------------|------------------------------------------------|--------------------------------------------------------------------------------------------------------------------------|-----------|
| <b>2010</b> <sup>58</sup>                                                                                                                                                                                                                   |                | therapy in the treatment and prevention of anxiety and depression                                                                     | Faculty of Health                              | 18–23 years old<br>N=38                        | 2) Face-to-face therapy and MoodGYM (n = 9)<br>3) Face-to-face therapy (n = 10)<br>4) Control without treatment (n = 10) | 0%        |
| # <b>Smith et al. 2015</b> <sup>59</sup>                                                                                                                                                                                                    | United Kingdom | To test the efficacy of Stressbusters, a Computerized-CBT (C-CBT) program, for depression                                             | Secondary schools                              | Adolescents<br>12–16 years<br>N=11             | 1) Stressbusters (n=55)<br>2) Wait list (n=57)                                                                           | 8<br>7%   |
| # <b>Stallard et al. 2011</b> <sup>60</sup>                                                                                                                                                                                                 | United Kingdom | To describe the development of a software package for depression and anxiety, and report preliminary results on feedback and outcomes | Child and Adolescent Mental Health Services    | Young people<br>11–16 years old<br>N=20        | 1) Think, Feel, Do immediately (n = 10)<br>2) Wait list control, intervention after delay (n = 10)                       | 15<br>25% |
| <b>Stasiak et al. 2014</b> <sup>35</sup>                                                                                                                                                                                                    | New Zealand    | To examine the feasibility, acceptability, and effects of a computerized program for depressed adolescents                            | Urban high schools                             | Students<br>13–18 years old<br>N=34            | 1) Computerized cCBT (n = 17)<br>2) Computer brief psychoeducation program (n = 17)                                      | 19<br>44% |
| * <b>Van Voorhees et al. 2008</b> <sup>36</sup><br><b>Hoek et al. 2011</b> <sup>32</sup><br><b>Saulsberry et al. 2013</b> <sup>34</sup><br><b>Van Voorhees et al. 2009a</b> <sup>37</sup><br><b>Van Voorhees et al. 2009b</b> <sup>38</sup> | USA            | To determine which primary care approach is more efficacious in reducing vulnerability in major depressive disorders                  | Primary care practice sites                    | Adolescent patients<br>14–21 years old<br>N=83 | 1) Motivational interview and CATCH-IT (n = 43)<br>2) Brief advice and CATCH-IT (n = 40)                                 | 77<br>7%  |
| <b>Whittaker et al. 2012</b> <sup>39</sup>                                                                                                                                                                                                  | New Zealand    | To develop and test novel mobile phone delivery, a depression prevention intervention                                                 | High schools                                   | Students<br>13-17 years old<br>N=855           | 1) Mobile phone program (n = 426)<br>2) Control program with different content of messages (n = 429)                     | 835<br>2% |
| <b>Wright et al. 2017</b> <sup>40</sup>                                                                                                                                                                                                     | United Kingdom | To assess the feasibility of delivering an RCT comparing Stressbusters with an attention control                                      | Children and Adolescent Mental Health Services | Adolescents<br>12–18 years old<br>N=91         | 1) Stressbusters (n=45)<br>2) Websites (n=46)                                                                            | 55<br>46% |

\* The study results were reported more than one article

# The study was included in the meta-analysis
